# Supplementary material
Source: Royal Society of Chemistry journal article supplement (doi:10.1039/d5nh00758e)
Supplement: d5nh00758e1.pdf [file d5nh00758e1.pdf]

## Supplementary Material

### Core–Shell Nanostructured Latex for Multifunctional Anti-corrosion and Flame-Retardant Coatings

Shufen Wang<sup>1,3\*</sup>, Ruping Xie<sup>1,3</sup>, Yue Zhang<sup>2</sup>, Yu Wu<sup>2</sup>, Xiaotong Zhao<sup>2</sup>, Jiapeng Tang<sup>1,3</sup>,  
Yunsheng Ding<sup>2\*\*</sup>

<sup>1</sup> School of Energy Materials and Chemical Engineering, Hefei University, Hefei, Anhui, 230000,  
P. R. China

<sup>2</sup> School of Chemistry and Chemical Engineering, Hefei University of Technology, Hefei, Anhui,  
230009, P. R. China

<sup>3</sup> Anhui Provincial Engineering Research Center for Green Coating High-performance Additives,  
Hefei, Anhui, 230000, P. R. China

### 3. Results and Discussion

#### 3.1 Film-forming property of PVC-PU-PBA

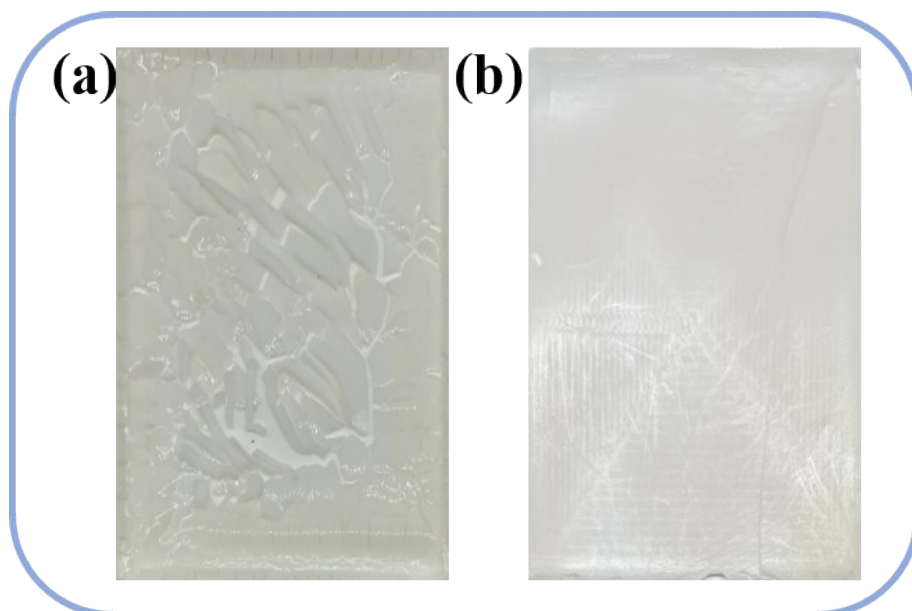

\*Corresponding author.

\*\*Corresponding author.

E-mail addresses: dbyotw@126.com (Shufen Wang), dingys@hfut.edu.cn (Yunsheng Ding).

**Fig. S1.** Film formation status diagram of (a) PVC and (b) PVC-PU-PBA

Compared with the PVC emulsion which could not film-forming, the PVC-PU-PBA film are smooth and flawless as can be seen from Fig.S1. This indicates that the addition of PU and BA significantly improves the film-forming properties of PVC.

### 3.2 The equivalent electrical circuits

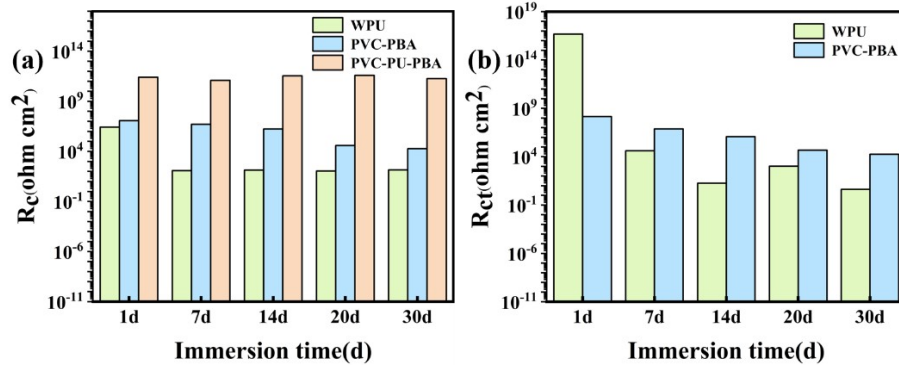

**Fig. S2.** Evolution of  $R_c$  and  $R_{ct}$  for the coatings during 30 days immersion.

**Table. S1** Values of  $R_c$  (ohm.cm<sup>2</sup>) at different immersion time

| Immersion time | PU                 | PVC-PBA            | PVC-PU-PBA            |
|----------------|--------------------|--------------------|-----------------------|
| 1d             | $2.69 \times 10^6$ | $1.18 \times 10^7$ | $2.54 \times 10^{11}$ |
| 7d             | 120.40             | $5.06 \times 10^6$ | $1.24 \times 10^{11}$ |
| 14d            | 135.80             | $1.70 \times 10^6$ | $3.52 \times 10^{11}$ |
| 20d            | 109.20             | $3.83 \times 10^4$ | $3.89 \times 10^{11}$ |
| 30d            | 141.00             | $1.85 \times 10^4$ | $1.85 \times 10^{11}$ |

**Table. S2** Values of  $R_{ct}$  (ohm.cm<sup>2</sup>) at different immersion time

| Immersion time | PU                 | PVC-PBA            |
|----------------|--------------------|--------------------|
| 1d             | $4.78 \times 10^6$ | $1.43 \times 10^8$ |
| 7d             | $4.11 \times 10^4$ | $7.31 \times 10^6$ |
| 14d            | 17.88              | $1.16 \times 10^6$ |
| 20d            | $1.05 \times 10^3$ | $4.69 \times 10^4$ |
| 30d            | 4.08               | $1.81 \times 10^4$ |

In cases of composite coatings, there were all single time constant corresponding

to the capacitive response of the coating during the immersion process.  $R_c$  is the coating resistance that represents the ability of the coating to block current through its own defects and pores [1].  $R_{ct}$  is the charge transfer resistance between steel and electrolyte, revealing the corrosion resistance of the steel [2]. Therefore, we discussed the coating resistance ( $R_c$ ) and the charge transfer resistance ( $R_{ct}$ ) of different coating and the related data were listed in Figs. S2a-b and Tables.S1-2, respectively. Generally, a higher  $R_c$  value indicates a greater protective performance of the coating. As shown in Fig.S2a and Table.S1, PVC-PU-PBA coated Q235 steel had the highest coating resistance compared to WPU and PVC-PBA coatings throughout the immersion process. Furthermore, PVC-PU-PBA coating has no  $R_{ct}$  value. The highest IE of 99.99%, was achieved by the PVC-PU-PBA coating after immersed in 3.5 wt% NaCl solution for 30 days as shown in Table.S3. Hence, the PVC-PU-PBA coating possess the best anticorrosive performance among all coatings.

**Table. S3** Polarization parameters of coatings in 3.5% NaCl solution

| Sample                      | $E_{\text{corr}}(\text{V})$ | $I_{\text{corr}}(\text{A}/\text{cm}^2)$ | CR (mm/year)          | IE (%) |
|-----------------------------|-----------------------------|-----------------------------------------|-----------------------|--------|
| <b>Bare Q<sub>235</sub></b> | -0.6120                     | $1.78 \times 10^{-4}$                   | 2.06                  | --     |
| <b>PU</b>                   | -0.4551                     | $4.12 \times 10^{-6}$                   | $4.78 \times 10^{-2}$ | 97.68  |
| <b>PVC-PBA</b>              | -0.6076                     | $3.92 \times 10^{-7}$                   | $4.54 \times 10^{-3}$ | 99.78  |
| <b>PVC-PU-PBA</b>           | 0.3460                      | $5.32 \times 10^{-13}$                  | $6.16 \times 10^{-9}$ | 99.99  |

The inhibition efficiency (IE, %) of the coatings was calculated according to equation (1) and the corrosion rate (CR mm/years) was obtained by the equation (2).

$$IE = \frac{i_{\text{corr}}^0 - i_{\text{corr}}}{i_{\text{corr}}^0} \times 100\% \quad (1)$$

where  $i_{\text{corr}}^0$  and  $i_{\text{corr}}$  are corrosion current density of the Q235 steel without and with the coatings, respectively.

$$CR = \frac{M \times I_{\text{corr}}}{n \rho F} \times 87600 \quad (2)$$

In which M is the molecular weight of Fe (56 mol/g) and n is the chemical price of Fe. In addition,  $\rho$  is the electrode density of Q235 steel ( $7.9 \text{ g}/\text{cm}^3$ ), and f is Faraday constant (26.8 Ah/mol) [3].

### 3.3 Flame retardancy of composites

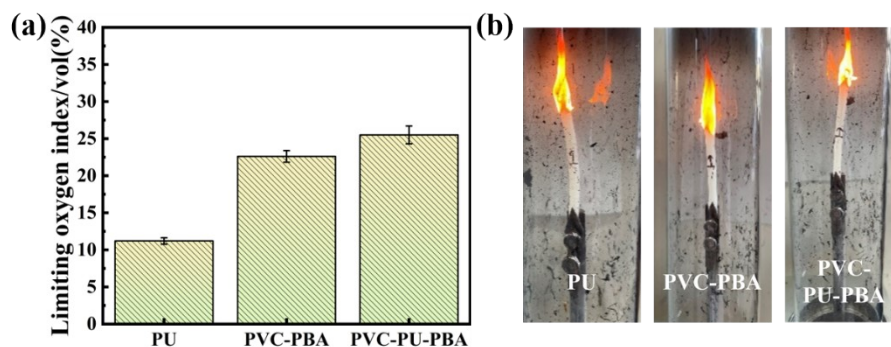

**Fig. S3.** PU, PVC-PBA, PVC-PU-PBA composites in LOI post-test.

As can be seen from Fig.S3, the limiting oxygen index of the PVC-PU-PBA latex has certain flame-retardant properties compared to pristine PU, and the intrinsic flame-retardant property of PVC was reflected well [4]. The flame-retardant properties of PVC-PU-PBA latex was improved with the combination of the PVC, PU, and PBA, because the fluidity of the melt decreases with the increase of the degree of crosslinking and the formation of a certain carbon layer, making the limiting oxygen index values of the latexes also increased [5].

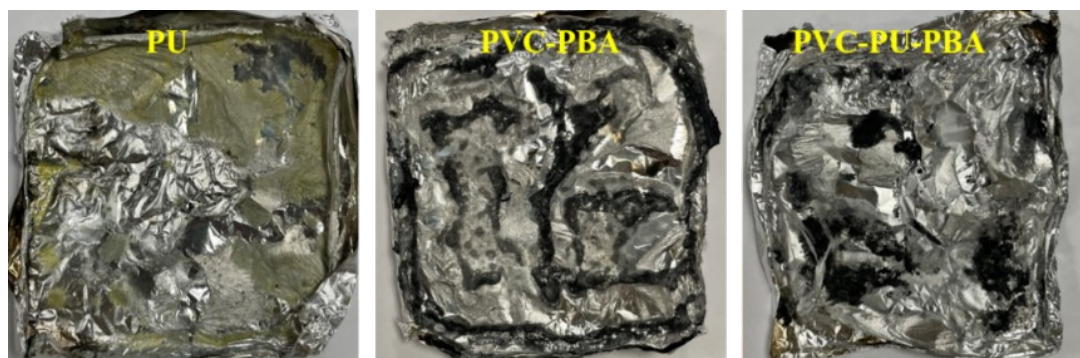

**Fig. S4.** Digital photographs of char residues of PU, PVC-PBA, and PVC-PU-PBA after the cone calorimeter test.

### References

- [1] Qiu S, Li W, Zheng W, Zhao H, Wang L. Synergistic Effect of Polypyrrole-Intercalated Graphene for Enhanced Corrosion Protection of Aqueous Coating in 3.5% NaCl Solution. *ACS Appl Mater Interfaces*. 2017;9(39):34294-304. <https://doi.org/10.1021/acsami.7b08325>

- [2] Liu S, Gu L, Zhao H, Chen J, Yu H. Corrosion Resistance of Graphene-Reinforced Waterborne Epoxy Coatings. *Journal of Materials Science & Technology*. 2016;32(5):425-31. <https://doi.org/10.1016/j.jmst.2015.12.017>
- [3] Yan H, Cai M, Li W, Fan X, Zhu M. Amino-functionalized Ti3C2T with anti-corrosive/wear function for waterborne epoxy coating. *Journal of Materials Science & Technology*. 2020;54:144-59. <https://doi.org/10.1016/j.jmst.2020.05.002>
- [4] Lubczak R, Broda D, Kus-Liśkiewicz M, Szczęch D, Bobko E, Dębska B, et al. Flameretardant polyurethane foams with starch unit. *Polymer Testing*. 2021;104:107395. <https://doi.org/10.1016/j.polymertesting.2021.107395>
- [5] Donmez Cavdar A. Effect of various wood preservatives on limiting oxygen index levels of fir wood. *Measurement*. 2014;50:279-84. <https://doi.org/10.1016/j.measurement.2014.01.009>
